# Supplementary material
Source: PubMed Central journal article supplement (PMC3628812)

**DMSO**

**25  $\mu\text{g/ml}$  Tunicamycin**

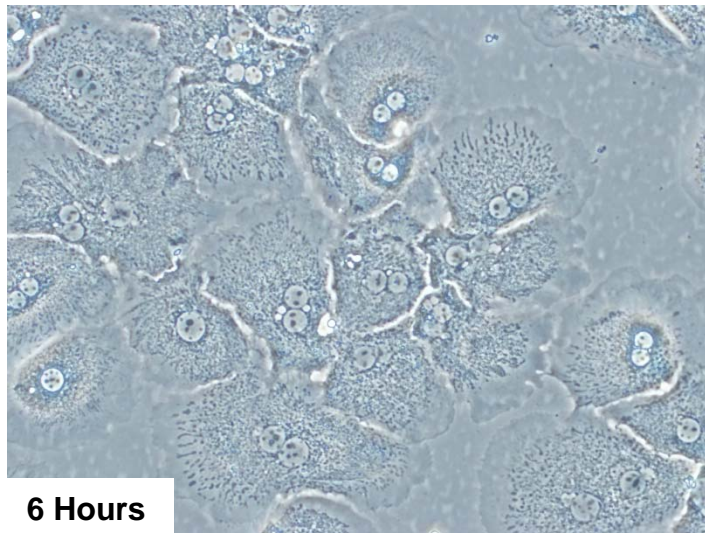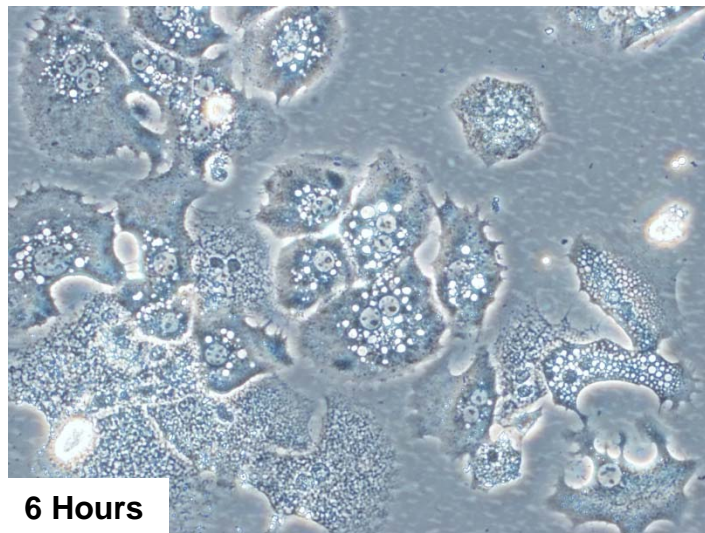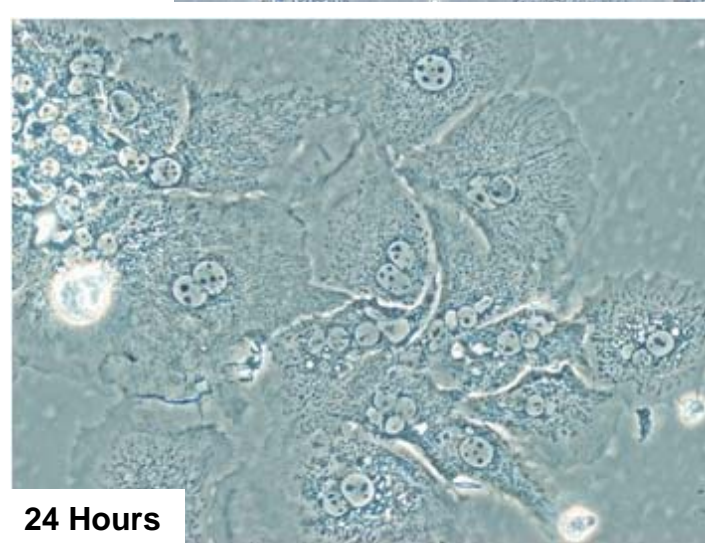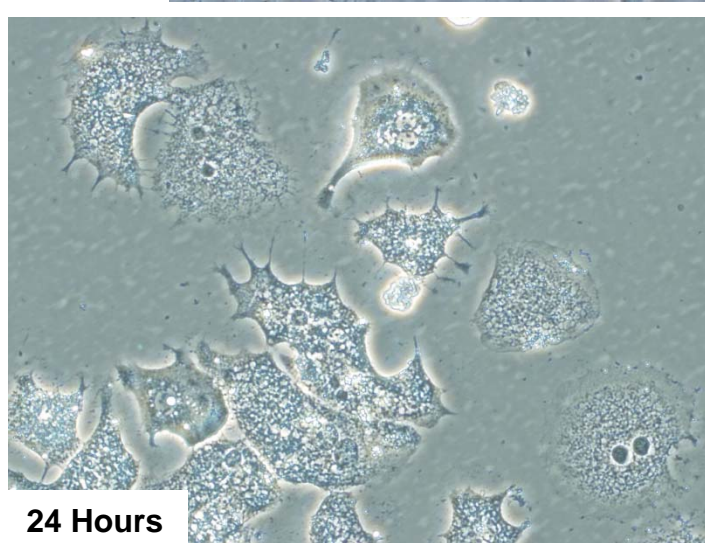

**A**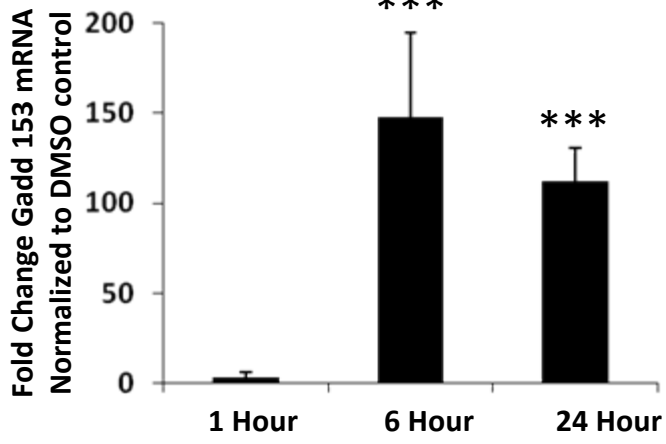**B**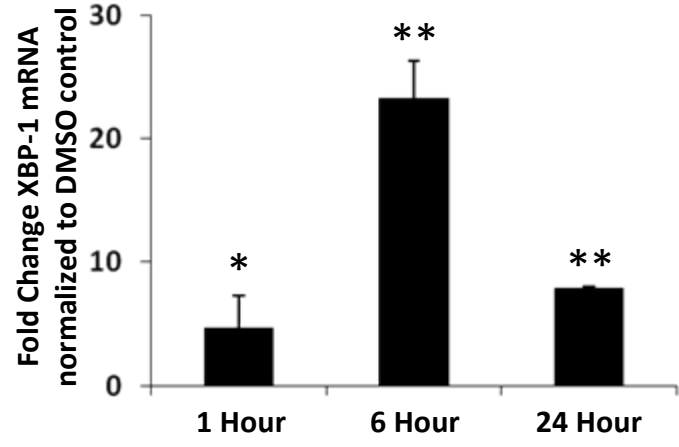

Supplement: NIHMS457737-supplement-Supplementary_Figures_1-2.pdf [file NIHMS457737-supplement-Supplementary_Figures_1-2.pdf]
